# Supplementary material
Source: PubMed Central journal article supplement (PMC7286796)
Supplement: NIHMS1568753-supplement-1.pdf [file NIHMS1568753-supplement-1.pdf]

# **Alcohol Use Disorder, But Not Cannabis Use Disorder, Symptomatology in Adolescents Is Associated With Reduced Differential Responsiveness to Reward Versus Punishment Feedback During Instrumental Learning**

## ***Supplemental Information***

### ***Supplemental Methods***

Youths recruited from Boys Town had been referred for behavioral and mental health problems, including substance use disorders. Participants from the community were recruited through flyers or social media. Clinical characterization was done through psychiatric interviews by licensed and board-certified child and adolescent psychiatrists with the participants and their parents/caregivers, to adhere closely to common clinical practice.

The Boys Town National Research Hospital institutional review board approved this study. A doctoral level researcher or a member of the clinical research team obtained written informed consent and assent. In all cases, youth had the right to decline participation at any time before or during the study.

Exclusion criteria for the broader project included IQ<75 assessed with the Wechsler Abbreviated Scale of Intelligence (WASI two-subtest form; Wechsler, 2011), pregnancy, non-psychiatric medical conditions that require the use of medication that may have psychotropic effects (e.g., beta blockers or steroids), current psychosis, pervasive developmental disorders, Tourette's disorder, neurological disorders, presence of metallic objects in the body (e.g., metal plates, pacemakers, etc.), and claustrophobia. Current psychiatric conditions (other than psychotic disorders or pervasive developmental disorders) were not exclusionary. Use of psychotropic medications for psychiatric indications (e.g., stimulants, selective serotonin reuptake inhibitors)

were not exclusory. However, participants on stimulant medication were asked to withhold medication on the day of scanning.

### *MRI Parameters*

All data were collected on a 3T Siemens Skyra scanner. A total of 313 functional images were taken with a T2\* weighted gradient echo planar imaging (EPI) sequence (repetition time=2500 ms; echo time=27 ms; 240 mm field of view; 94x94 matrix; 90° flip angle). Whole-brain coverage was obtained with 43 axial slices (thickness, 2.5 mm; voxel size 2.6x2.6x2.5 mm<sup>3</sup>). A high-resolution T1 anatomical scan (MP-RAGE, repetition time=2200 ms; echo time=2.48 ms; 230 mm field of view; 8° flip angle; 256x208 matrix; thickness, 1 mm; voxel size .9x.9x1 mm<sup>3</sup>) in register with the EPI data set was obtained covering the whole brain with 176 axial slices.

### *fMRI Preprocessing*

Functional MRI data were preprocessed and analyzed using Analysis of Functional NeuroImages (AFNI) software (2). The anatomical scan for each participant was registered to the Talairach and Tournoux atlas (3) and each participant's functional EPI data were registered to their Talairach anatomical scan in AFNI. Functional images were motion corrected to a reference volume and spatially smoothed with a 6-mm full width at half maximum Gaussian kernel. The data then underwent time series normalization to a T1 image, and these results were multiplied by 100 for each voxel. Therefore, the resultant regression coefficients are representative of a percentage of signal change from the mean.

### *Correction for Multiple Comparisons*

Correction for multiple comparisons was performed using a spatial clustering operation in AFNI's 3dClustSim utilizing the autocorrelation function (-acf) with 10,000 Monte Carlo simulations for the whole-brain analysis. Spatial autocorrelation was estimated from residuals

from the individual-level GLMs. The initial threshold was set at  $p=.001$  (4, 5). This process yielded an extent threshold of  $k=16$  contiguous voxels for the whole brain (NN1/facewise neighbor clustering). Follow-up analyses were conducted on the percent signal change taken from all significant voxels within each functional ROI generated by AFNI to examine significant main effects and interactions with planned follow-up testing within SPSS 22.0 (6).

### ***Supplemental Results***

#### *AUDIT and CUDIT Skewness and Kurtosis*

For AUDIT scores, pre-transformation skewness and kurtosis values were 2.59 and 7.48, respectively. Post-transformation, skewness and kurtosis values for AUDIT scores were 0.65 and -0.44. The skewness and kurtosis values for CUDIT scores were 0.81 and -0.48, respectively, so no transformation was applied to the CUDIT scores.

#### *Main Effect of Feedback*

There was a significant main effect of feedback within dorsomedial prefrontal/anterior cingulate cortex, bilateral anterior insular cortex/inferior frontal gyrus, left lingual gyrus, right middle temporal gyrus, right lingual gyrus, right middle frontal gyrus, left supramarginal gyrus, middle cingulate cortex, left middle temporal gyrus, brainstem, right supramarginal gyrus, and precuneus. In all brain regions, there was greater activation for punishment feedback relative to reward feedback. See Table S1 for more details.

#### *Movement Data*

Volumes were censored if there was  $>0.5$  mm motion across adjacent volumes. Thirteen out of 154 participants were due to excessive motion ( $>20\%$  censored volumes) on the task. This

resulted in a final sample of N=141 participants. There was no relationship between AUDIT scores or CUDIT scores and number of censored TR's, average motion per TR, or maximum displacement during the task [ $r$ 's=-0.01-0.10,  $p$ 's>.05]

### *Demographic and Clinical Variables*

Tables S1-S3 break down demographic and clinical variables by i) group comparisons of demographic/clinical variables for adolescents with AUDIT scores=0 versus AUDIT scores $\geq$ 4; ii) group comparisons of demographic/clinical variables for adolescents with CUDIT scores=0 versus CUDIT scores $\geq$ 8; and iii) demographic and clinical variables for adolescents with both AUDIT<4 and CUDIT<8, AUDIT $\geq$ 4 and CUDIT<8, AUDIT<4 and CUDIT $\geq$ 8, and both AUDIT $\geq$ 4 and CUDIT $\geq$ 8.

### *Potential Confounds*

Given that our sample reflected clinical reality, there were a number of potential confounds, including medication usage, co-morbid psychiatric conditions, placement, and sex differences. Briefly, we identified nine potential confounds and for each potential confound we conducted an additional analysis that repeated the main analysis controlling for that specific confound. We chose to run separate models for each confounding variable because including all of these variables in one model would substantially reduce the statistical power of our analyses, as 11 regressors would be included in our model. In addition, we wished to interrogate these potential confounds individually so that each could be evaluated on its own merits.

Since AUDIT and CUDIT scores were associated with antidepressant use and the participants were permitted to use those medications on the day of scanning, the same analysis was repeated with antidepressant use entered as a covariate. This analysis revealed a pattern of results highly similar to the main analysis; specifically, the striatal, parietal cortex, and posterior cingulate

cortex findings remained significant after covarying for antidepressant use (Table S5). To rule out the possibility that pathology related to psychiatric co-morbidities influenced our results, our main analysis was repeated with each of the four most common psychiatric diagnoses as a covariate (ADHD, CD, MDD, GAD). Each of these analyses revealed a pattern of results highly similar to the main analysis; specifically, the striatal, parietal cortex, and PCC findings remained significant after controlling for each of the diagnostic categories (Tables S6-S9). To rule out the possibility that our results could be attributed to smoking status, we repeated the same analysis with smoking as a covariate; the striatal and parietal cortex findings remained significant in this analysis (Table S10). Although many participants with significant substance use histories in this study were members of the residential treatment program and were subject to random drug testing in the weeks prior to scanning, one participant with a significant substance use history was recruited from the community and not subject to random drug testing. We repeated the same analysis with this participant excluded from the sample; the striatal and parietal cortex remained significant in this analysis (Table S11). We also repeated the same analysis with placement (Boys Town versus Community) as a covariate; the striatal and parietal cortex remained significant in this analysis (Table S12). Since there was a significant difference between females and males on AUDIT scores, we repeated the same analysis with sex a categorical variable. The striatal, parietal, and PCC findings remained significant (Table S13).

**Supplemental References**

1. Wechsler D (2011): *Wechsler Abbreviated Scale of Intelligence—Second Edition*. San Antonio, TX: NCS Pearson.
2. Cox RW (1996): AFNI: Software for Analysis and Visualization of Functional Magnetic Resonance Neuroimages. *Comput Biomed Res.* 29: 162–173.
3. Talairach J, Tournoux P (1988): *Co-Planar Stereotaxic Atlas of the Human Brain: 3-D Proportional System: An Approach to Cerebral Imaging*, 1st ed. Stuttgart: Thieme.
4. Cox RW, Chen G, Glen DR, Reynolds RC, Taylor PA (2017): FMRI Clustering in AFNI: False-Positive Rates Redux. *Brain Connect.* 7: 152–171.
5. Cox RW, Chen G, Glen DR, Reynolds RC, Taylor PA (2017): FMRI Clustering and False Positive Rates. *Proc Natl Acad Sci U S A.* 114. doi: 10.1089/brain.2016.0475.
6. *IBM SPSS Statistics For MacOSX* (2012): Armonk, NY: IBM Corp.

**Table S1.** Group Comparisons of Demographic Variables between Adolescents with AUDIT=0 and Adolescents with AUDIT $\geq$ 4 (n=102)

| Variable           | AUDIT=0 (N=59) | AUDIT $\geq$ 4 (N=43) | t/chi-square value |
|--------------------|----------------|-----------------------|--------------------|
| Age (SD)           | 16.5 (1.06)    | 16.9 (0.99)           | -2.18*             |
| IQ (SD)            | 98.1 (9.35)    | 99.6 (10.82)          | -0.79              |
| % Male             | 72.9%          | 58.1%                 | 2.42               |
| MDD Diagnosis      | 10.2%          | 23.3%                 | 3.22               |
| GAD Diagnosis      | 15.3%          | 46.5%                 | 11.94*             |
| CD Diagnosis       | 28.8%          | 69.8%                 | 16.79*             |
| ADHD Diagnosis     | 45.8%          | 65.1%                 | 3.75               |
| Antidepressant Use | 13.6%          | 32.6%                 | 5.31*              |
| Stimulant Use      | 16.9%          | 14.0%                 | 0.17               |
| Antipsychotic Use  | 10.2%          | 7.0%                  | 0.32               |

\*indicates significant t/chi-square value at  $p < .05$  (to be interpreted with caution, as all other analyses utilize a dimensional approach)

**Table S2.** Group Comparisons of Demographic Variables between Adolescents with CUDIT=0 and Adolescents with CUDIT $\geq$ 8 (n=117)

| Variable           | CUDIT=0 (N=55) | CUDIT $\geq$ 8 (N=62) | t/chi-square value |
|--------------------|----------------|-----------------------|--------------------|
| Age (SD)           | 16.5 (1.03)    | 16.6 (1.02)           | -0.44              |
| IQ (SD)            | 98.8 (9.29)    | 100.3 (10.51)         | -0.85              |
| % Male             | 61.8%          | 66.1%                 | 0.24               |
| MDD Diagnosis      | 5.5%           | 21.0%                 | 5.94*              |
| GAD Diagnosis      | 18.2%          | 38.7%                 | 5.96*              |
| CD Diagnosis       | 21.8%          | 71.0%                 | 26.28*             |
| ADHD Diagnosis     | 32.7%          | 69.4%                 | 15.67*             |
| Antidepressant Use | 12.7%          | 30.6%                 | 5.41*              |
| Stimulant Use      | 14.5%          | 17.7%                 | 0.22               |
| Antipsychotic Use  | 9.1%           | 9.7%                  | 0.01               |

\*indicates significant t/chi-square value at  $p < .05$  (to be interpreted with caution, as all other analyses utilize a dimensional approach)



**Table S3.** Demographic and Clinical Variables between Adolescents with AUDIT<4 and CUDIT<8, AUDIT≥4 only, CUDIT≥8 only, and both AUDIT≥4 and CUDIT≥8

| Variable           | AUDIT<4 and<br>CUDIT<8 (N=71) | AUDIT≥4 only (N=8) | CUDIT≥8 only (N=27) | AUDIT≥4 and CUDIT≥8<br>(N=35) |
|--------------------|-------------------------------|--------------------|---------------------|-------------------------------|
| Age (SD)           | 16.5 (1.18)                   | 17.7 (0.57)        | 16.35 (1.07)        | 16.7 (0.97)                   |
| IQ (SD)            | 99.8 (10.00)                  | 104.5 (7.82)       | 102.6 (9.26)        | 98.5 (11.18)                  |
| % Male             | 62.0%                         | 62.5%              | 77.8%               | 57.1%                         |
| MDD Diagnosis      | 9.9%                          | 12.5%              | 14.8%               | 25.7%                         |
| GAD Diagnosis      | 16.9%                         | 37.5%              | 18.5%               | 48.6%                         |
| CD Diagnosis       | 25.4%                         | 50.0%              | 66.7%               | 74.3%                         |
| ADHD Diagnosis     | 38.0%                         | 50.0%              | 70.4%               | 68.6%                         |
| Antidepressant Use | 8.5%                          | 25.0%              | 25.9%               | 34.3%                         |
| Stimulant Use      | 14.5%                         | 0.0%               | 18.5%               | 17.1%                         |
| Antipsychotic Use  | 8.5%                          | 0.0%               | 11.1%               | 8.6%                          |

\*indicates significant t/chi-square value at  $p<.05$  (to be interpreted with caution, as all other analyses utilize a dimensional approach)

| <b>Table S4. Brain regions demonstrating significant responses to feedback type</b> |            |     |     |     |     |       |                  |        |
|-------------------------------------------------------------------------------------|------------|-----|-----|-----|-----|-------|------------------|--------|
| <u>Coordinates of Peak Activation<sup>b</sup></u>                                   |            |     |     |     |     |       |                  |        |
| Region <sup>a</sup>                                                                 | Hemisphere | BA  | x   | y   | z   | F     | Partial $\eta^2$ | Voxels |
| <u>Punishment&gt;Reward</u>                                                         |            |     |     |     |     |       |                  |        |
| Dorsomedial Prefrontal Cortex/Anterior Cingulate Cortex                             | R/L        | 6/8 | 5   | 14  | 56  | 44.23 | 0.244            | 700    |
| Anterior Insular Cortex/Inferior Frontal Gyrus                                      | R          | 45  | 50  | 20  | 8   | 38.01 | 0.217            | 278    |
| Anterior Insular Cortex/Inferior Frontal Gyrus                                      | L          | 47  | -37 | 20  | -1  | 38.08 | 0.218            | 266    |
| Lingual Gyrus                                                                       | L          | 18  | -22 | -55 | 2   | 26.56 | 0.162            | 131    |
| Middle Temporal Gyrus                                                               | R          | 38  | 44  | 11  | -31 | 32.77 | 0.193            | 90     |
| Middle Temporal Gyrus                                                               | R          | 21  | 53  | -28 | -4  | 34.61 | 0.202            | 85     |
| Lingual Gyrus                                                                       | R          | 30  | 20  | -58 | 5   | 26.46 | 0.162            | 74     |
| Middle Frontal Gyrus                                                                | R          | 9   | 41  | 8   | 35  | 27.39 | 0.167            | 62     |
| Supramarginal Gyrus                                                                 | L          | 40  | -58 | -43 | 26  | 22.93 | 0.143            | 46     |
| Middle Cingulate Cortex                                                             | R/L        | 23  | 2   | -19 | 32  | 20.13 | 0.128            | 35     |
| Middle Temporal Gyrus                                                               | L          | 21  | -52 | -19 | -1  | 22.38 | 0.140            | 29     |
| Middle Temporal Gyrus                                                               | L          | 39  | -49 | -52 | 14  | 18.50 | 0.119            | 25     |
| Brainstem                                                                           | R/L        | -   | 5   | -16 | -22 | 23.39 | 0.146            | 23     |
| Supramarginal Gyrus                                                                 | R          | 40  | 56  | -46 | 23  | 19.15 | 0.123            | 23     |
| Supramarginal Gyrus                                                                 | R          | 40  | 35  | -52 | 35  | 17.46 | 0.113            | 22     |
| Middle Frontal Gyrus                                                                | R          | 6   | 41  | -1  | 50  | 19.78 | 0.126            | 22     |
| Precuneus                                                                           | L          | 7   | -4  | -49 | 47  | 16.64 | 0.108            | 16     |

Note: <sup>a</sup> According to the Talairach Daemon Atlas (<http://www.nitrc.org/projects/tal-daemon/>), <sup>b</sup> Based on the Tournoux & Talairach standard brain template, BA= Brodmann's Area

**Table S5.** Brain regions demonstrating significant AUDIT-by-Feedback Interactions Covarying for Prescribed Antidepressant Usage

| Region <sup>a</sup>         | Coordinates of Peak Activation <sup>b</sup> |                                      |     |     |     | <i>F</i> | Partial $\eta^2$ | Voxels |  |
|-----------------------------|---------------------------------------------|--------------------------------------|-----|-----|-----|----------|------------------|--------|--|
|                             | Hemisphere                                  | BA                                   | x   | y   | z   |          |                  |        |  |
|                             |                                             | <u>AUDIT-by-Feedback<sup>c</sup></u> |     |     |     |          |                  |        |  |
| Caudate/Putamen*            | L                                           | -                                    | -13 | 14  | 8   | 20.68    | 0.132            | 27     |  |
| Putamen*                    | L                                           | -                                    | -19 | 8   | 2   | 16.87    | 0.110            | 19     |  |
| Posterior Cingulate Cortex* | L                                           | 29/30                                | -10 | -49 | 5   | 17.52    | 0.114            | 19     |  |
| Superior Parietal Lobule*   | R                                           | 7                                    | 38  | -55 | 50  | 18.92    | 0.122            | 27     |  |
| Occipital Cortex*           | R                                           | 19/39                                | 32  | -73 | 26  | 17.77    | 0.116            | 30     |  |
| Cerebellum                  | R                                           | -                                    | 11  | -49 | -22 | 18.96    | 0.122            | 16     |  |

Note: <sup>a</sup> According to the Talairach Daemon Atlas (<http://www.nitrc.org/projects/tal-daemon/>), <sup>b</sup> Based on the Tournoux & Talairach standard brain template, <sup>c</sup> Note that all interactions reflect a negative relationship between AUDIT scores and the reward > punishment contrast, \*, \* denotes clusters that overlap with significant clusters found in the main analysis, BA= Brodmann's Area

**Table S6.** Brain regions demonstrating significant AUDIT-by-Feedback Interactions Covarying for ADHD Diagnosis

| Region <sup>a</sup>         | Hemisphere | Coordinates of Peak Activation <sup>b</sup> |     |     |    | <i>F</i> | Partial $\eta^2$ | Voxels |
|-----------------------------|------------|---------------------------------------------|-----|-----|----|----------|------------------|--------|
|                             |            | BA                                          | x   | y   | z  |          |                  |        |
|                             |            | <u>AUDIT-by-Feedback<sup>c</sup></u>        |     |     |    |          |                  |        |
| Caudate/Putamen*            | L          | -                                           | -13 | 14  | 8  | 20.43    | 0.131            | 27     |
| Putamen*                    | L          | -                                           | -19 | 8   | 2  | 16.66    | 0.109            | 20     |
| Posterior Cingulate Cortex* | L          | 29/30                                       | -10 | -49 | 5  | 17.63    | 0.115            | 19     |
| Superior Parietal Lobule*   | R          | 7                                           | 38  | -55 | 50 | 17.75    | 0.115            | 17     |
| Occipital Cortex*           | R          | 19/31                                       | 32  | -73 | 17 | 16.86    | 0.110            | 20     |

Note: <sup>a</sup> According to the Talairach Daemon Atlas (<http://www.nitrc.org/projects/tal-daemon/>), <sup>b</sup> Based on the Tournoux & Talairach standard brain template, <sup>c</sup> Note that all interactions reflect a negative relationship between AUDIT scores and the reward > punishment contrast, \* denotes clusters that overlap with significant clusters found in the main analysis, BA= Brodmann's Area

**Table S7.** Brain regions demonstrating significant AUDIT-by-Feedback Interactions Covarying for CD Diagnosis

| Region <sup>a</sup>         | Coordinates of Peak Activation <sup>b</sup> |    |     |     |    | <i>F</i> | Partial $\eta^2$ | Voxels |
|-----------------------------|---------------------------------------------|----|-----|-----|----|----------|------------------|--------|
|                             | Hemisphere                                  | BA | x   | y   | z  |          |                  |        |
|                             | <u>AUDIT-by-Feedback<sup>c</sup></u>        |    |     |     |    |          |                  |        |
| Caudate/Putamen*            | L                                           | -  | -13 | 14  | 8  | 19.83    | 0.127            | 25     |
| Posterior Cingulate Cortex* | L                                           | 30 | -16 | -52 | 8  | 18.19    | 0.118            | 26     |
| Superior Parietal Lobule*   | R                                           | 7  | 38  | -55 | 50 | 22.27    | 0.141            | 49     |
| Precuneus                   | R                                           | 7  | 29  | -67 | 38 | 17.10    | 0.112            | 21     |
| Postcentral Gyrus           | L                                           | 3  | -43 | -25 | 53 | 14.17    | 0.094            | 16     |
| Occipital Cortex*           | R                                           | -  | 35  | -67 | 20 | 17.24    | 0.112            | 21     |

Note: <sup>a</sup> According to the Talairach Daemon Atlas (<http://www.nitrc.org/projects/tal-daemon/>), <sup>b</sup> Based on the Tournoux & Talairach standard brain template, <sup>c</sup> Note that all interactions reflect a negative relationship between AUDIT scores and the reward > punishment contrast, \* denotes clusters that overlap with significant clusters found in the main analysis, BA= Brodmann's Area

| <b>Table S8. Brain regions demonstrating significant AUDIT-by-Feedback Interactions Covarying for GAD Diagnosis</b> |                   |           |          |          |          |          |                                    |               |
|---------------------------------------------------------------------------------------------------------------------|-------------------|-----------|----------|----------|----------|----------|------------------------------------|---------------|
| <b>Coordinates of Peak Activation<sup>b</sup></b>                                                                   |                   |           |          |          |          |          |                                    |               |
| <b>Region<sup>a</sup></b>                                                                                           | <b>Hemisphere</b> | <b>BA</b> | <b>x</b> | <b>y</b> | <b>z</b> | <b>F</b> | <b>Partial <math>\eta^2</math></b> | <b>Voxels</b> |
| <b>AUDIT-by-Feedback<sup>c</sup></b>                                                                                |                   |           |          |          |          |          |                                    |               |
| Caudate/Putamen*                                                                                                    | L                 | -         | -13      | 14       | 8        | 19.58    | 0.126                              | 24            |
| Posterior Cingulate Cortex*                                                                                         | L                 | 30        | -10      | -43      | -1       | 18.79    | 0.121                              | 26            |
| Superior Parietal Lobule*                                                                                           | R                 | 7         | 38       | -55      | 50       | 18.27    | 0.118                              | 21            |
| Occipital Cortex*                                                                                                   | R                 | -         | 35       | -67      | 20       | 17.14    | 0.112                              | 26            |
| Cerebellum                                                                                                          | R                 | -         | 11       | -49      | -22      | 19.95    | 0.128                              | 19            |

Note: <sup>a</sup> According to the Talairach Daemon Atlas (<http://www.nitrc.org/projects/tal-daemon/>), <sup>b</sup> Based on the Tournoux & Talairach standard brain template, <sup>c</sup> Note that all interactions reflect a negative relationship between AUDIT scores and the reward > punishment contrast, \* denotes clusters that overlap with significant clusters found in the main analysis, BA= Brodmann's Area

**Table S9.** Brain regions demonstrating significant AUDIT-by-Feedback Interactions Covarying for MDD Diagnosis

| Region <sup>a</sup>         | Coordinates of Peak Activation <sup>b</sup> |       |     |     |    | <i>F</i> | Partial $\eta^2$ | Voxels |
|-----------------------------|---------------------------------------------|-------|-----|-----|----|----------|------------------|--------|
|                             | Hemisphere                                  | BA    | x   | y   | z  |          |                  |        |
|                             | <u>AUDIT-by-Feedback<sup>c</sup></u>        |       |     |     |    |          |                  |        |
| Caudate/Putamen*            | L                                           | -     | -13 | 14  | 8  | 20.38    | 0.130            | 26     |
| Putamen <sup>d*</sup>       | L                                           | -     | -19 | 8   | 2  | 16.64    | 0.109            | 15     |
| Posterior Cingulate Cortex* | L                                           | 29/30 | -10 | -49 | 5  | 17.93    | 0.117            | 19     |
| Superior Parietal Lobule*   | R                                           | 7     | 38  | -55 | 50 | 17.62    | 0.115            | 16     |
| Occipital Cortex*           | R                                           | 19    | 32  | -73 | 26 | 17.28    | 0.113            | 25     |

Note: <sup>a</sup> According to the Talairach Daemon Atlas (<http://www.nitrc.org/projects/tal-daemon/>), <sup>b</sup> Based on the Tournoux & Talairach standard brain template, <sup>c</sup> Note that all interactions reflect a negative relationship between AUDIT scores and the reward > punishment contrast, <sup>d</sup> Below the Clustsim threshold, \* denotes clusters that overlap with significant clusters found in the main analysis, BA= Brodmann's Area

| <b>Table S10.</b> Brain regions demonstrating significant AUDIT-by-Feedback Interactions Covarying for Smoking |            |    |     |     |    |          |                  |        |  |
|----------------------------------------------------------------------------------------------------------------|------------|----|-----|-----|----|----------|------------------|--------|--|
| Coordinates of Peak Activation <sup>b</sup>                                                                    |            |    |     |     |    |          |                  |        |  |
| Region <sup>a</sup>                                                                                            | Hemisphere | BA | x   | y   | z  | <i>F</i> | Partial $\eta^2$ | Voxels |  |
| AUDIT-by-Feedback <sup>c</sup>                                                                                 |            |    |     |     |    |          |                  |        |  |
| Caudate/Putamen*                                                                                               | L          | -  | -13 | 14  | 8  | 19.53    | 0.127            | 25     |  |
| Superior Parietal Lobule*                                                                                      | R          | 7  | 38  | -55 | 50 | 18.26    | 0.120            | 25     |  |

Note: <sup>a</sup> According to the Talairach Daemon Atlas (<http://www.nitrc.org/projects/tal-daemon/>), <sup>b</sup> Based on the Tournoux & Talairach standard brain template, <sup>c</sup> Note that all interactions reflect a negative relationship between AUDIT scores and the reward > punishment contrast, \* denotes clusters that overlap with significant clusters found in the main analysis, BA= Brodmann's Area



**Table S11.** Brain regions demonstrating significant AUDIT-by-Feedback Interactions Excluding Community Participants with significant substance use

| Region <sup>a</sup>                      | Coordinates of Peak Activation <sup>b</sup> |       |     |     |    | <i>F</i> | Partial $\eta^2$ | Voxels |
|------------------------------------------|---------------------------------------------|-------|-----|-----|----|----------|------------------|--------|
|                                          | Hemisphere                                  | BA    | x   | y   | z  |          |                  |        |
|                                          | <u>AUDIT-by-Feedback<sup>c</sup></u>        |       |     |     |    |          |                  |        |
| Caudate/Putamen*                         | L                                           | -     | -13 | 14  | 8  | 19.96    | 0.128            | 21     |
| Superior Parietal Lobule*                | R                                           | 7     | 38  | -55 | 50 | 19.20    | 0.124            | 29     |
| Posterior Cingulate Cortex <sup>d*</sup> | L                                           | 29/30 | -10 | -49 | 5  | 15.44    | 0.102            | 10     |

Note: <sup>a</sup> According to the Talairach Daemon Atlas (<http://www.nitrc.org/projects/tal-daemon/>), <sup>b</sup> Based on the Tournoux & Talairach standard brain template, <sup>c</sup> Note that all interactions reflect a negative relationship between AUDIT scores and the reward > punishment contrast, <sup>d</sup> Below the clustsim threshold, \* denotes clusters that overlap with significant clusters found in the main analysis, BA= Brodmann's Area

**Table S12.** Brain regions demonstrating significant AUDIT-by-Feedback Interactions Covarying for Placement (Boys Town versus Community)

| Region <sup>a</sup>       | Coordinates of Peak Activation <sup>b</sup> |    |     |     |    | <i>F</i> | Partial $\eta^2$ | Voxels |
|---------------------------|---------------------------------------------|----|-----|-----|----|----------|------------------|--------|
|                           | Hemisphere                                  | BA | x   | y   | z  |          |                  |        |
|                           | <u>AUDIT-by-Feedback<sup>c</sup></u>        |    |     |     |    |          |                  |        |
| Caudate/Putamen*          | L                                           | -  | -13 | 14  | 8  | 19.39    | 0.125            | 21     |
| Superior Parietal Lobule* | R                                           | 7  | 38  | -55 | 50 | 18.26    | 0.113            | 27     |

Note: <sup>a</sup> According to the Talairach Daemon Atlas (<http://www.nitrc.org/projects/tal-daemon/>), <sup>b</sup> Based on the Tournoux & Talairach standard brain template, <sup>c</sup> Note that all interactions reflect a negative relationship between AUDIT scores and the reward > punishment contrast, \* denotes clusters that overlap with significant clusters found in the main analysis, BA= Brodmann's Area

| <b>Table S13. Brain regions demonstrating significant AUDIT-by-Feedback Interactions Covarying for Sex</b> |                   |           |          |          |          |          |                                    |               |
|------------------------------------------------------------------------------------------------------------|-------------------|-----------|----------|----------|----------|----------|------------------------------------|---------------|
| <u>Coordinates of Peak Activation<sup>b</sup></u>                                                          |                   |           |          |          |          |          |                                    |               |
| <u>Region<sup>a</sup></u>                                                                                  | <u>Hemisphere</u> | <u>BA</u> | <u>x</u> | <u>y</u> | <u>z</u> | <u>F</u> | <u>Partial <math>\eta^2</math></u> | <u>Voxels</u> |
| <u>AUDIT-by-Feedback<sup>c</sup></u>                                                                       |                   |           |          |          |          |          |                                    |               |
| Caudate/Putamen*                                                                                           | L                 | -         | -13      | 14       | 8        | 16.80    | 0.110                              | 21            |
| Posterior Cingulate Cortex*                                                                                | L                 | 29/30     | -10      | -49      | 5        | 13.47    | 0.090                              | 18            |
| Superior Parietal Lobule*                                                                                  | R                 | 7         | 38       | -55      | 50       | 22.44    | 0.142                              | 20            |
| Occipital Cortex*                                                                                          | R                 | 19        | 32       | -73      | 17       | 20.42    | 0.131                              | 20            |

Note: <sup>a</sup> According to the Talairach Daemon Atlas (<http://www.nitrc.org/projects/tal-daemon/>), <sup>b</sup> Based on the Tournoux & Talairach standard brain template, <sup>c</sup> Note that all interactions reflect a negative relationship between AUDIT scores and the reward > punishment contrast, \* denotes clusters that overlap with significant clusters found in the main analysis, BA= Brodmann's Area
